# Supplementary material for: Heritability Estimation using a Regularized Regression Approach (HERRA): Applicable to continuous, dichotomous or age-at-onset outcome
Source: PubMed Central journal article supplement (PMC5559077; doi:10.1371/journal.pone.0181269), 2017-08-16
Supplement: pone.0181269.s001.pdf [file pone.0181269.s001.pdf]

## Heritability Estimation using a Regularized Regression Approach (HERRA): Applicable to Continuous, Dichotomous or Survival Outcome

Malka Gorfine<sup>1,\*</sup>, Sonja I Berndt<sup>2</sup>, Jenny Chang-Claude<sup>3</sup>, Michael Hoffmeister<sup>4</sup>, Loic Le Marchand<sup>5</sup>, John Potter<sup>6</sup>, Martha L Slattery<sup>7</sup>, Nir Keret<sup>1</sup>, Ulrike Peters<sup>6</sup>, Li Hsu<sup>6,\*</sup>

**1 Department of Statistics and Operation Research, Tel Aviv University, Tel Aviv, Israel**

**2 Division of Cancer Epidemiology and Genetics, National Cancer Institute, National Institutes of Health**

**3 Division of Cancer Epidemiology, German Cancer Research Center, Heidelberg, Germany**

**4 Division of Clinical Epidemiology and Aging Research, German Cancer Research Center, Heidelberg, Germany**

**5 Epidemiology Program, University of Hawaii Cancer Center**

**6 Public Health Sciences Division, Fred Hutchinson Cancer Research Center, Seattle, WA**

**7 Department of Internal Medicine, University of Utah Health Sciences Center**

**\* Correspondence: [gorfine@post.tau.ac.il](mailto:gorfine@post.tau.ac.il), [lih@fredhutch.org](mailto:lih@fredhutch.org)**

## S1 Table: Tables of simulation results

The following S1 Table provides details of simulation results that are summarized by figures in the main text - continuous trait, one chromosome.

**Table S1.** Simulation results of continuous trait and one chromosome: empirical mean (empirical  $SD \times 10^2$ ), relative efficiency (RE), and mean-squared error (MSE)  $\times 10^4$ . For HERRA, RE is defined as the ratio of the variance of GCTA's estimator to the variance of HERRA's estimator. RE greater than 1 indicates that HERRA's estimator is more efficient.  $p$  equals the number of causal SNPs.

| $p$                                                                                       | $h^2$     |              |       | $\sigma_e^2$ | $\sigma_Y^2$ | $\sigma_g^2$ |               |
|-------------------------------------------------------------------------------------------|-----------|--------------|-------|--------------|--------------|--------------|---------------|
|                                                                                           | mean (SD) | RE           | MSE   | mean (SD)    | mean (SD)    | mean (SD)    |               |
| true values: $h^2 = 0.1$ ; $\sigma_e^2 = 1$ ; $\sigma_Y^2 = 1.111$ ; $\sigma_g^2 = 0.111$ |           |              |       |              |              |              |               |
| $N = 5000$                                                                                |           |              |       |              |              |              |               |
| 100                                                                                       | H         | 0.105 (1.28) | 1.702 | 1.930        | 0.986 (2.08) | 1.102 (2.17) | -             |
|                                                                                           | L         | 0.089 (1.46) | 1.308 | 3.342        | 1.004 (2.37) | -            | 0.098 (1.65)  |
|                                                                                           | G         | 0.095 (1.67) | 1.000 | 3.049        | 0.998 (2.46) | -            | 0.105 (1.88)  |
| 250                                                                                       | H         | 0.109 (1.26) | 1.098 | 2.357        | 0.993 (2.15) | 1.109 (2.32) | -             |
|                                                                                           | L         | 0.103 (1.49) | 0.785 | 2.310        | 0.999 (2.23) | -            | 0.115 (1.17)  |
|                                                                                           | G         | 0.105 (1.32) | 1.000 | 1.980        | 0.996 (2.21) | -            | 0.117 (1.53)  |
| $N = 10000$                                                                               |           |              |       |              |              |              |               |
| 100                                                                                       | H         | 0.105 (0.74) | 1.414 | 0.759        | 0.988 (1.41) | 1.104 (1.61) | -             |
|                                                                                           | L         | 0.089 (0.92) | 0.915 | 2.056        | 1.005 (1.52) | -            | 0.098 (1.06)  |
|                                                                                           | G         | 0.098 (0.88) | 1.000 | 0.827        | 0.996 (1.51) | -            | 0.108 (1.02)  |
| 250                                                                                       | H         | 0.103 (0.70) | 1.306 | 0.574        | 0.996 (1.46) | 1.110 (1.51) | -             |
|                                                                                           | L         | 0.098 (0.81) | 1.269 | 0.696        | 0.999 (1.53) | -            | 0.109 (0.93)  |
|                                                                                           | G         | 0.097 (0.80) | 1.000 | 0.713        | 0.999 (1.54) | -            | 0.108 (0.92)  |
| true values: $h^2 = 0.6$ ; $\sigma_e^2 = 1$ ; $\sigma_Y^2 = 2.5$ ; $\sigma_g^2 = 1.5$     |           |              |       |              |              |              |               |
| $N = 5000$                                                                                |           |              |       |              |              |              |               |
| 100                                                                                       | H         | 0.584 (1.07) | 1.688 | 3.641        | 0.998 (2.26) | 2.400 (4.80) | -             |
|                                                                                           | L         | 0.625 (1.04) | 1.786 | 7.332        | 0.989 (2.58) | -            | 1.649 (0.049) |
|                                                                                           | G         | 0.587 (1.39) | 1.000 | 3.545        | 0.978 (2.65) | -            | 1.393 (5.70)  |
| 250                                                                                       | H         | 0.582 (0.91) | 1.887 | 4.177        | 1.041 (2.46) | 2.489 (5.04) | -             |
|                                                                                           | L         | 0.563 (1.13) | 1.224 | 14.967       | 1.047 (2.87) | -            | 1.349 (4.25)  |
|                                                                                           | G         | 0.578 (1.25) | 1.000 | 6.580        | 1.016 (2.86) | -            | 1.390 (4.87)  |
| $N = 10000$                                                                               |           |              |       |              |              |              |               |
| 100                                                                                       | H         | 0.580 (0.67) | 1.253 | 4.291        | 1.008 (1.50) | 2.403 (3.71) | -             |
|                                                                                           | L         | 0.563 (0.85) | 0.779 | 14.413       | 1.061 (1.18) | -            | 1.367 (3.45)  |
|                                                                                           | G         | 0.576 (0.75) | 1.000 | 6.565        | 0.992 (1.63) | -            | 1.345 (3.14)  |
| 250                                                                                       | H         | 0.590 (0.70) | 1.653 | 1.490        | 1.021 (1.69) | 2.491 (3.19) | -             |
|                                                                                           | L         | 0.563 (0.80) | 1.266 | 14.330       | 1.047 (1.77) | -            | 1.351 (3.28)  |
|                                                                                           | G         | 0.582 (0.90) | 1.000 | 4.159        | 1.012 (1.73) | -            | 1.407 (4.05)  |

H - HERRA, L - LDAK, G - GCTA
