# Supplementary material for: Heritability Estimation using a Regularized Regression Approach (HERRA): Applicable to continuous, dichotomous or age-at-onset outcome
Source: PubMed Central journal article supplement (PMC5559077; doi:10.1371/journal.pone.0181269), 2017-08-16
Supplement: pone.0181269.s009.pdf [file pone.0181269.s009.pdf]

# Heritability Estimation using a Regularized Regression Approach (HERRA): Applicable to Continuous, Dichotomous or Survival Outcome

Malka Gorfine<sup>1,\*</sup>, Sonja I Berndt<sup>2</sup>, Jenny Chang-Claude<sup>3</sup>, Michael Hoffmeister<sup>4</sup>, Loic Le Marchand<sup>5</sup>, John Potter<sup>6</sup>, Martha L Slattery<sup>7</sup>, Nir Keret<sup>1</sup>, Ulrike Peters<sup>6</sup>, Li Hsu<sup>6,\*</sup>

**1 Department of Statistics and Operation Research, Tel Aviv University, Tel Aviv, Israel**

**2 Division of Cancer Epidemiology and Genetics, National Cancer Institute, National Institutes of Health**

**3 Division of Cancer Epidemiology, German Cancer Research Center, Heidelberg, Germany**

**4 Division of Clinical Epidemiology and Aging Research, German Cancer Research Center, Heidelberg, Germany**

**5 Epidemiology Program, University of Hawaii Cancer Center**

**6 Public Health Sciences Division, Fred Hutchinson Cancer Research Center, Seattle, WA**

**7 Department of Internal Medicine, University of Utah Health Sciences Center**

**\* Correspondence: [gorfine@post.tau.ac.il](mailto:gorfine@post.tau.ac.il), [lih@fredhutch.org](mailto:lih@fredhutch.org)**

## S9 Text: Details on quality assurance and quality control of the colorectal cancer GWAS dataset

**Table S1. Quality assurance and quality control**

| Study   | Sample Exclusions <sup>1</sup> | Duplicate Concordance | Sample Call Rate | SNP Exclusions <sup>2</sup> | SNPs Passing QC | SNP Call Rate |
|---------|--------------------------------|-----------------------|------------------|-----------------------------|-----------------|---------------|
|         | N                              | %                     | Mean             | N                           | N               | Mean          |
| Colo2&3 | 42                             | 100.0%                | 99.90%           | 30,446                      | 252,176         | 99.95%        |
| DACHS1  | 227                            | 99.90%                | 99.93%           | 33,588                      | 252,208         | 99.90%        |
| DALS2   | 5                              | 100.0%                | 99.94%           | 32,885                      | 250,320         | 99.94%        |
| MEC     | 61                             | 100.0%                | 99.97%           | 34,494                      | 259,364         | 99.96%        |
| PLCO2   | 31                             | 99.90%                | 99.80%           | 38,655                      | 253,702         | 99.90%        |
| VITAL   | 163                            | 99.90%                | 99.81%           | 36,805                      | 243,625         | 99.89%        |
| WHI2    | 42                             | 100.0%                | 99.96%           | 30,446                      | 251,707         | 99.96%        |

<sup>1</sup>Samples were excluded for duplicate errors, gender errors, a call rate < 97%, outlying the CEU HapMap2 cluster in PCA, heterozygosity, and concordance with non-duplicates samples > 65%.

<sup>2</sup>Directly genotyped SNPs were excluded for a call rate < 98%, Hardy Weinberg Equilibrium (HWE) < 10<sup>-4</sup>, and minor allele frequency (MAF < 1%).
